# Supplementary material for: Prognostic Biomarkers for Esophageal Adenocarcinoma Identified by Analysis of Tumor Transcriptome
Source: PubMed Central journal article supplement (PMC2994829; doi:10.1371/journal.pone.0015074), 2010-11-30
Supplement: pone.0015074.s001.pdf [file pone.0015074.s001.pdf]

**A**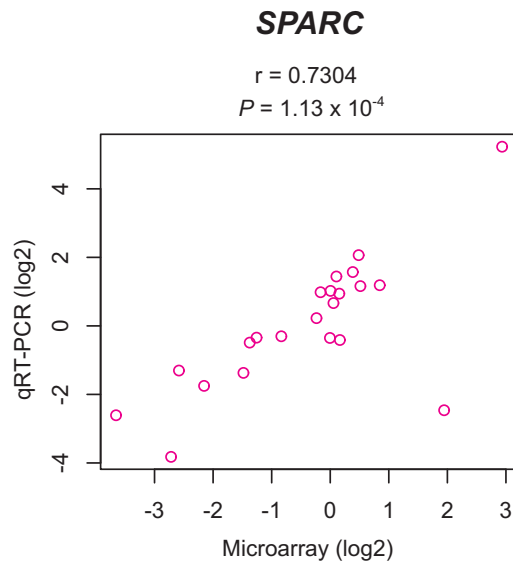**B**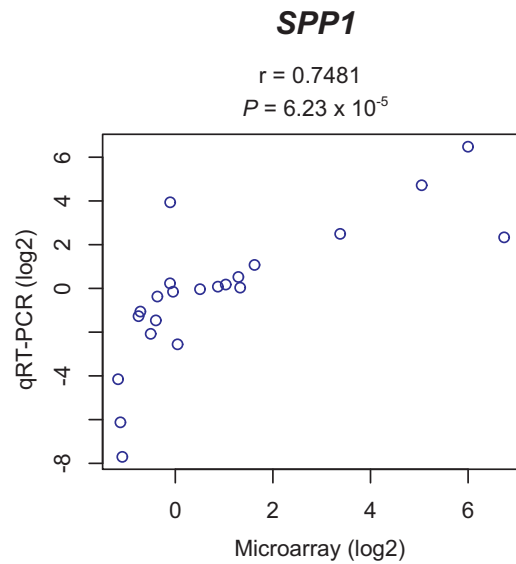

**Figure S1** Comparison of *SPARC* and *SPP1* expression data obtained from real-time RT-PCR and microarray experiments.

Gene expression in RT-PCR experiments was normalized to the expression level of *PPIA* (cyclophilin A) in the sample and centralized by subtracting median expression value across samples. Gene expression data from microarray were also centralized by subtracting median expression value across samples.

**(A)** Scatter plots of normalized *SPARC* expression levels between two experiments from 24 EAC tissues. Pearson correlation coefficient between two experiments and significance of correlation coefficient is indicated at the top of plots.

**(B)** Scatter plots of normalized *SPP1* expression levels between two experiments from 24 EAC tissues.
