# Supplementary material for: Prognostic Biomarkers for Esophageal Adenocarcinoma Identified by Analysis of Tumor Transcriptome
Source: PubMed Central journal article supplement (PMC2994829; doi:10.1371/journal.pone.0015074), 2010-11-30
Supplement: pone.0015074.s003.pdf [file pone.0015074.s003.pdf]

**Table S1** Top 20 list of gene networks from Ingenuity™ Pathway Analysis

| Δ  | Molecules in Network                                                                                                                                                                                                                                                                                                                  | Score |
|----|---------------------------------------------------------------------------------------------------------------------------------------------------------------------------------------------------------------------------------------------------------------------------------------------------------------------------------------|-------|
| 1  | ↑ALDH1B1, ↑BATF, ↑C2, ↑C1R, ↑CSORF13, ↑CD93, ↑COL8A1, Complement component 1, ↑CTGF, ↑EDG3 (includes EG:1903), ↑EDNRA, ↑GLA, ↑IFNAR2, Igfbp, ↑MFHAS1, Mmp, ↑MMP2, ↑MMP11, NfkB, ↑PCOLCE, Pdgf, Pdgf Ab, ↑PDGFB, Pdgfra-Pdgfrb, ↑PDGFRB, ↑RFTN1, ↓RIPK4, ↑SFRP2, ↑SPARC, ↓STAP2, Tgf beta, ↑THBS1, ↑THBS2, ↑TIMP1, ↑TNFAIP6            | 43    |
| 2  | Akt, ↑APLN, ↑CCT2, ↑CDC7, ↑CDC25B, ↑CDK4, ↑CHEK1, ↑CLEC11A, ↑COL18A1, ↑COL4A1, ↑COL4A2, Cyclin A, Cyclin B, Cyclin E, E2f, ↑EXOSC8, ↑FBLN2, ↑FHOD1, Hsp90, ↑HSP90A1, ↑HYOU1, ↑IGFBP7, ↑ITGA5, ↑MCAM, ↑MCM2, Mek, ↑NID2, ↑NRP1, ↑PPT1, Rb, ↑SPOCK1, ↑SULF1, ↑THY1, Vegf, ↑WISP1                                                        | 41    |
| 3  | ↑AEBP1, ↑ANGPT2, ↑ANTXR1*, ↑BUB1B, Cbp/p300, ↑CEBPB, ↑COL1A1, ↑CXCL2, ↑ENO2, ERK1/2, ↑FAP, ↑FCGR2A, Fgfr, ↑FSTL1, IL1, ↑IL6, ↑IL11, ↑IL24, ↑ITGA11, JAK, ↑LIF, Mek1/2, ↑OIP5, p70 S6k, PI3K, ↑PTP4A3, ↑RIPK2, ↑SNX10, SOCS5, ↑SOCS4, ↑SPP1, STAT, Tnf receptor, ↑TNFRSF11B, ↑UBE2C                                                    | 36    |
| 4  | ↑ADCY3, Adenylate Cyclase, ↓DHR59, ↑DKK3, ↑ELK1, ↑ENTPD1, ↑EPHB1, ↑ESM1, ↑FHL3, ↑FNDC1, G alphaI, G protein beta gamma, ↑GRM8, Integrin, Integrin, Integrinβ, ↑ITGA1, ↑ITGB1, Jnk, ↑LGALS1, ↑MAD2L2, ↑NES, Nfat, P38 MAPK, ↑PGM2L1, PLC gamma, Rac, Ras, ↑RGS4, ↑RGS16, ↑SEPT4, Sod, ↑TGM2, ↑VCAM1, ↑ZAK                              | 32    |
| 5  | Actin, ↑ACTN1, ↑ADFP, Alkaline Phosphatase, Ap1, ↑CALD1, CaMKII, ↑CDC42EP2, Ck2, ↓CLOCK, Creb, F Actin, Fibrin, ↑FKHL18, ↑GAS1, ↓GSN, ↑HNRPD, ↑HTRA1, LDL, Mapk, ↑MMP1, ↑MMP3, Myosin, ↑PCAF, PDGF BB, ↑PKD2 (includes EG:5311), Rxr, ↑SCARF2, ↑STC1, ↑STC2, ↑THRA, ↑TPM2, Tropomyosin, ↑TWIST1, ↓ZNF433                              | 30    |
| 6  | ↑ABCD1, ↑AEBP1, ↑ASP, ↑BCL6B, BMP1, BUB1 (includes EG:699), CS, ↑CDH11, CENPE, CLDN5, ↑CMTM3, ↑COL5A1, ↑COL5A2, COL5A3, DUSP4, ↑EDNRA, ↑FZD2, GJA7, ↑GREM1, hydrogen peroxide, ↑IGFBP7, ITGB6, MAPK1, ↑PLOD1, ↑PLOD2, ↑PRKRIR, Procollagen-lysine 5-dioxygenase, ↑RCN1, ↓SCNN1A, ↑SERPINH1, ↑SH2B3, ↑SPARC, TGFβ1, TJP1, ↓TJP3        | 30    |
| 7  | ↑ADAMT55, CBLC, ↑COL3A1, ↓CROT, ↑CTS, ↑CYB5B, CYP2D9, EGFR, GH1, growth factor receptor, ↑HS2ST1, Igfbp, IGFBP2, ↑ISLR, ↑ITGA1, ↑LINGO1, ↑LYPLA3, ↑MICB, ↑MTHFD2, ↑NNMT, ↓OAS1, ODC1, PAX3, PBX1, PDCD6IP, PTPN12, retinoic acid, ↑SCML1, ↑SH3KBP1, SRGN, ↑STC1, TF, TIA1, ↑VCAN, ↑ZNF281                                             | 26    |
| 8  | 5'-methylthioadenosine, ADCYAP1R1, ↑AURKA, CHFR, CIAA1, CIAA2, ↑COL10A1, COL11A2, ↑COL1A2, ↑COL3A1, COL5A3, ↑DNMT1, ↑EDNRA, ELP2, ↑FZD2, HELZ, Histone h3, ↑HSD11B1, Insulin, IRS, ↑PARP1, PDZK1, Pka, Pkc(s), PLC, ↑PTPRE, RNA polymerase II, ↑SCARB1, ↑SERPINH1, ↑SMOC2, ↑SMYD3, STAS1a/b, ↑STX2, ↑TM4SF18, ↓VAMP8                  | 22    |
| 9  | ↑CSORF13, ↑CDKN2AIP, ↑CKLF, ↑COL1A1, ↑COL4A1, ↑CTGF, ↑DKFZP762E1312, DNA-directed DNA polymerase, ELAVL1, ↑ENO2, Glutathione peroxidase, GPX1, ↑GPX7, HDAC3, ID2, ↑KIAA1199, ↑KNTC1, MAF, ↑MFAP2, MYB, NBN, NME1, NOTCH1, POLG, ↑POLG2, PRDM5, ↑QPR1, ↑RAB15, RUNX1, RXRB, SOD2, ↑TFAM, ↑TMSL8, TP53, VHL                             | 22    |
| 10 | ↑ALPK2, butyric acid, ↑CDH11, CHI3L1, ↑COL4A1, ↑COL5A2, ↑COL6A1, ↑COL6A2, ↑COL6A3, COL6A1 MAPPED, ↑DNMT1P1, ELL, F7, FBN1, FIGF, FOS, ↑FSTL1, GAPDH (includes EG:2597), ↑GAS1, GEMIN4, ↑KCNJ8, KCNJ11, ↑LEPRE1, MYCN, ↑NOLA1, NR3C1, ↑POFUT1, ↑PROCR, ↑PRRX1, PTPRN, ↓RNF141, SIP1, SMARCD1, SMN1, WEE1                               | 22    |
| 11 | AMH, ATPase, ↑CD300A, CDKN1A, chondroitin sulfate B, ↑COL1A1, ↑CROP, ↑CTSK, DDR1, ELN, FGF7, FGF13, Fgfr, FGFR2, FOXM1, ↓FXD3, GTF2I, HSPA5, ↑HYOU1, IL1R1, ↑KIAA1274, KRAS, ↑LGALS1, lipoxin A4, ↑LUM, ↑MMP3, ↑NFE2L3, PTPN11, ↑RADS1C, S100A4, ↓SDC1, SHP, ↑SLN (includes EG:6588), ↑SPAG5, ↑VCAN                                   | 20    |
| 12 | ↑ANGPT12, ↑CALU (includes EG:813), ↑COL3A1, CREB1, CTNNB1, dihydrotestosterone, ETV1, Frizzled, ↑HTRA1, INHBB, ↑KLK1 (includes EG:3816), LRP6, MME, ↑MMP1, ↑NRCAM, OSM, PBSN, ↑PP1L5, ↑PTPRG, ↑QPCT (includes EG:25797), SERPINA3, SFTPB, ↑SLC7A6, ↑SNAI1, ↑SPARC, TCF4, ↑TDO2, TERT, TF, ↑TNFRSF11B, Wnt, ↑WNT2, WNT4, WNT10B, WNT5A | 20    |
| 13 | ↑ADAMT54, BMYO, ↑DYSF, ↑FADS3, FBLN1, FIGF, FLNB, GLB1, ↑ITGA5, ITGA9 (includes EG:3680), ↑ITGB1, LAMA1, LAMA2, LAMA3, ↑LAMA4, LAMAS, LAMA4 PREDICTED, ↑LAMB1, LAMB3, LAMB1-2, ↑LAMC1, LAMC2, ↑LGALS1, ↑NID2, PLG, ↑SCHIP1, SMARCA4, ↓SPINK5, sulfatides, ↑TEAD2, ↑TEAD4, TNNT2, ↑TRIM37, ↑VCAN, VGLL1                                | 20    |
| 14 | ADM2, AGRP, ↑ANGPT2, ↑ATIC, ↑CALCRL, CRMP1, cyclic AMP, CYP27B1, ↓CYP2C18, Dihydropyrimidinase, DLK1, ↑DPYSL2, ↑DPYSL3, DPYSL5, E2F1, ↑ENO2, ↓ETFDH, ↑H2AFX, HAND1, HAND2, ↑HEY1, ↑HEYL, IGF1, L-triiodothyronine, LEP, ↑MDC1, MYH6, NPPA, POU1F1, RAMP1, RAMP2, RAMP3, ↑TRPV2, ↓TSPO, ↑ZNF22                                         | 19    |
| 15 | ↑AHS1, ↓AK3L1, ↑ANTXR2, ↑ATAD3A, Ca2+, CANX, CAPZB, ↑CHN1 (includes EG:1123), ↑CNTNAP1, ↑COL4A1, DLG1, EEF1E1, ↑ENPEP, FCGRT, ↑GPR124, GRIN2A, ↑H2AFZ, HMG2, HSP90AA1, LAMP1, ↑MAP1A, MYC, PEG3 (includes EG:5178), ↑PODXL, POLD1, ↓RALGAP5, RFX1, RFX3, SREBF1, ST14, TAC3, ↑THBS2, TP53, ↑UBE2C, WT1                                | 19    |
| 16 | ADORA2B, Caspase 3/7, CCL8, CCL18, CD163, ↑CDCA5, CDKN2A, ↑CHTF18, CLEC4E, ↓CPEB3, ↑CST1, CTSC, ↑DCC1, DERP, ↑FADS1, GPNMB, ↑IFI30, IFNG, IL13, LAMP1, NFYB, NUP98, ↑NUP107, NUP133, NUP160, RFC4, RFX1, RFX5, ↑SALL4, ↑SLC43A3, TLR1, ↑TMEM158, ↑TMEPAI, ↑USP13, ↓ZNF323                                                             | 17    |
| 17 | beta-estradiol, ↑CENPM, ↑CHST13, ↑CTGF, estrone, FGF7, FOSL2, GFAP, ↑GUCY1A3, GUCY1B3, Igfbp, IGFBP4, ↑ITGBL1, LCN2, ↑LYPD1, Mmp, MMP7, ↑MMP23A, ↑NKD2, PLAT, ↑PLEKHA4, ↑PLXDC1, ↑PRPS1, PTTG1, ↓SDCBP2, SERPINA1, SERPINA3, SERPINB5, ↓SH3RF2, SOCS2, sulfotransferase, TFP12, TGFA, TM4SF1, ZNF217                                  | 15    |
| 18 | ↑ACOT9, ↓AKR1B10, ARG1, ARNT2, BTNL2, CBFB, CCRN4L (includes EG:25819), ↑COL11A1, ↑COL12A1, ↑COL15A1, CYP27B1, ↑DOCK11, GBP2 (includes EG:14469)Δ, GBP2 (includes EG:2634), HSP90AA2, IFIT1L, IL4, IL19, IL33, IL10RA, LAMB3, ↑MMD, P4HB, PLP1, ↑PPF1A1, ↑RAB27B, SLC29A1, ↑SYT11, ↓SYTL1, Timp, TNF, ↑TOMM34, USP2, ↑WASH1, YWHAG    | 15    |
| 19 | ↑CHSY1, ↑CSS3, Glucuronyl-N-acetylgalactosaminylproteoglycan beta-1,4-N-acetylgalactosaminyltransferase, N-acetylgalactosaminyl-proteoglycan 3-beta-glucuronosyltransferase                                                                                                                                                           | 3     |
| 20 | ↑APOD1, leukotriene D4                                                                                                                                                                                                                                                                                                                | 2     |

The score is a numerical value used to rank networks according to how relevant they are to the genes in input dataset (406 genes). The score takes into account the number of genes in the network and the size of the network to approximate how relevant this network is to input gene list.
